# Supplementary material
Source: PubMed Central journal article supplement (PMC4562870)
Supplement: NIHMS674563-supplement-Suppl_Fig_1.pdf [file NIHMS674563-supplement-Suppl_Fig_1.pdf]

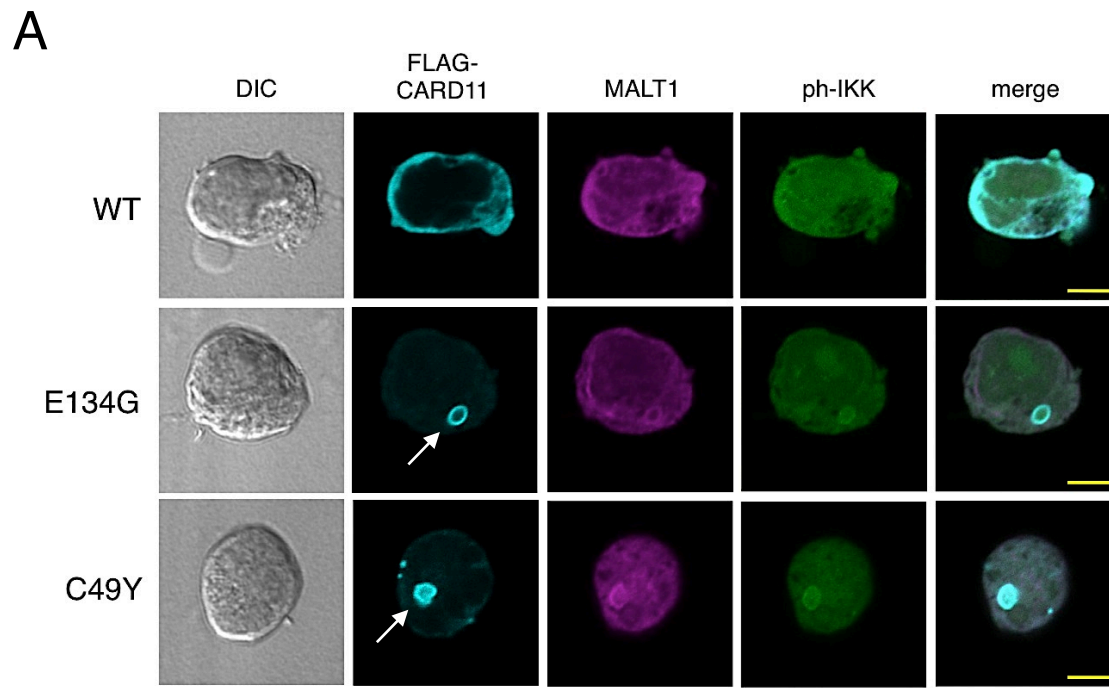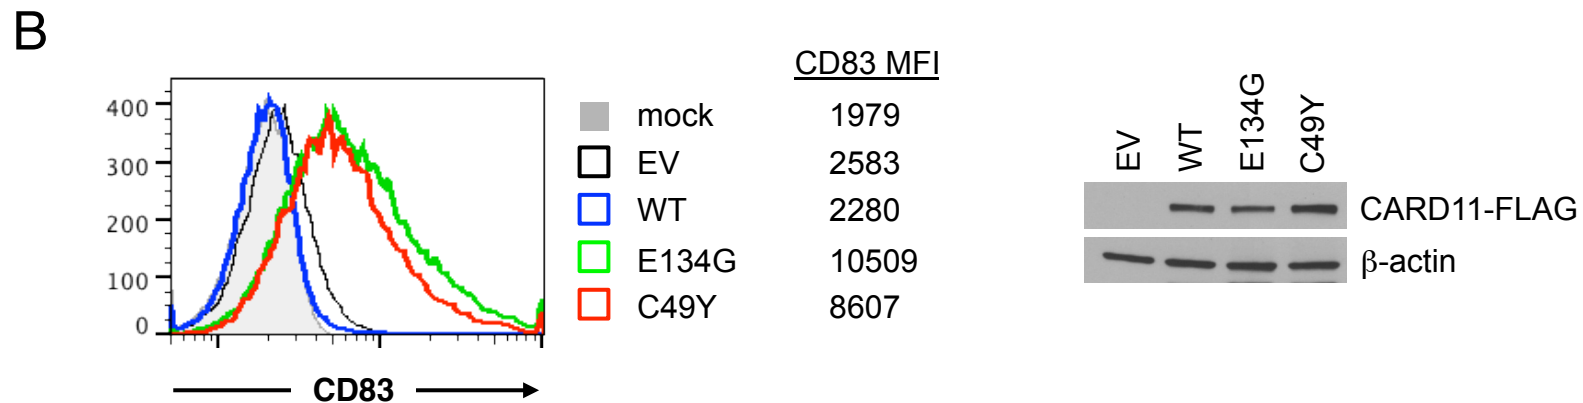

**Supplemental Figure 1:** (A) BJAB B cells were transfected with FLAG-CARD11 constructs and analyzed by fluorescent confocal microscopy 24 hrs post-transfection, staining with antibodies against FLAG, MALT1, and phospho-IKK. White arrows indicate mutant CARD11 aggregates. Scale bars = 5  $\mu$ M. (B) BJAB B cells were transfected as in (A) and assayed 24 hrs later for NF- $\kappa$ B-dependent CD83 expression by flow cytometry. Mean Fluorescence Intensity (MFI) values for CD83 are shown, indicative of the relative amount of NF- $\kappa$ B activation. Immunoblotting of whole cell lysates is shown at right. Mock = untransfected cells, EV=empty vector, WT=wild type.
